# Supplementary material for: Diels–Alder reactions of nickel(ii) N-confused porphyrins as dienophiles
Source: Royal Society of Chemistry journal article supplement (doi:10.1039/b203813g), 2002-01-01
Supplement: b203813g(1).doc [file b203813g%281%29.doc]

**Electronic Supplementary Information**

**Diels-Alder reactions of nickel(II) N-confused porphyrins as dienophiles**

**Ziwei Xiao, Brian Patrick and David Dolphin***

*Department of Chemistry, University of British Columbia, 2036 Main Mall, Vancouver, BC V6T 1Z1, Canada. E-mail:* [ddolphin@qltinc.com](mailto:ddolphin@qltinc.com)

***
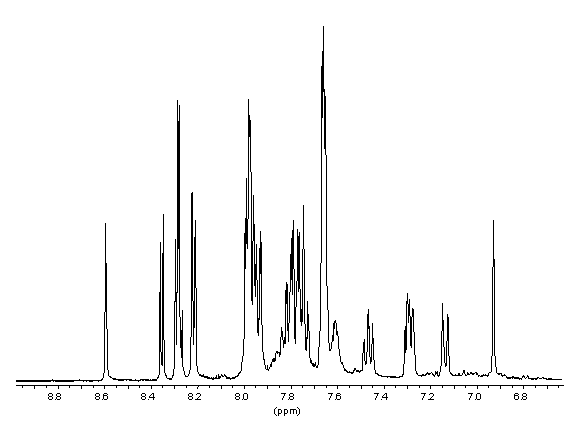
***

**Figure 1.** 1H NMR spectrum of compound **5a** (400 MHz, CD2Cl2).

**Figure 2.** 1H/15N HSQC spectrum of **5a** (400 MHz, CD2Cl2).


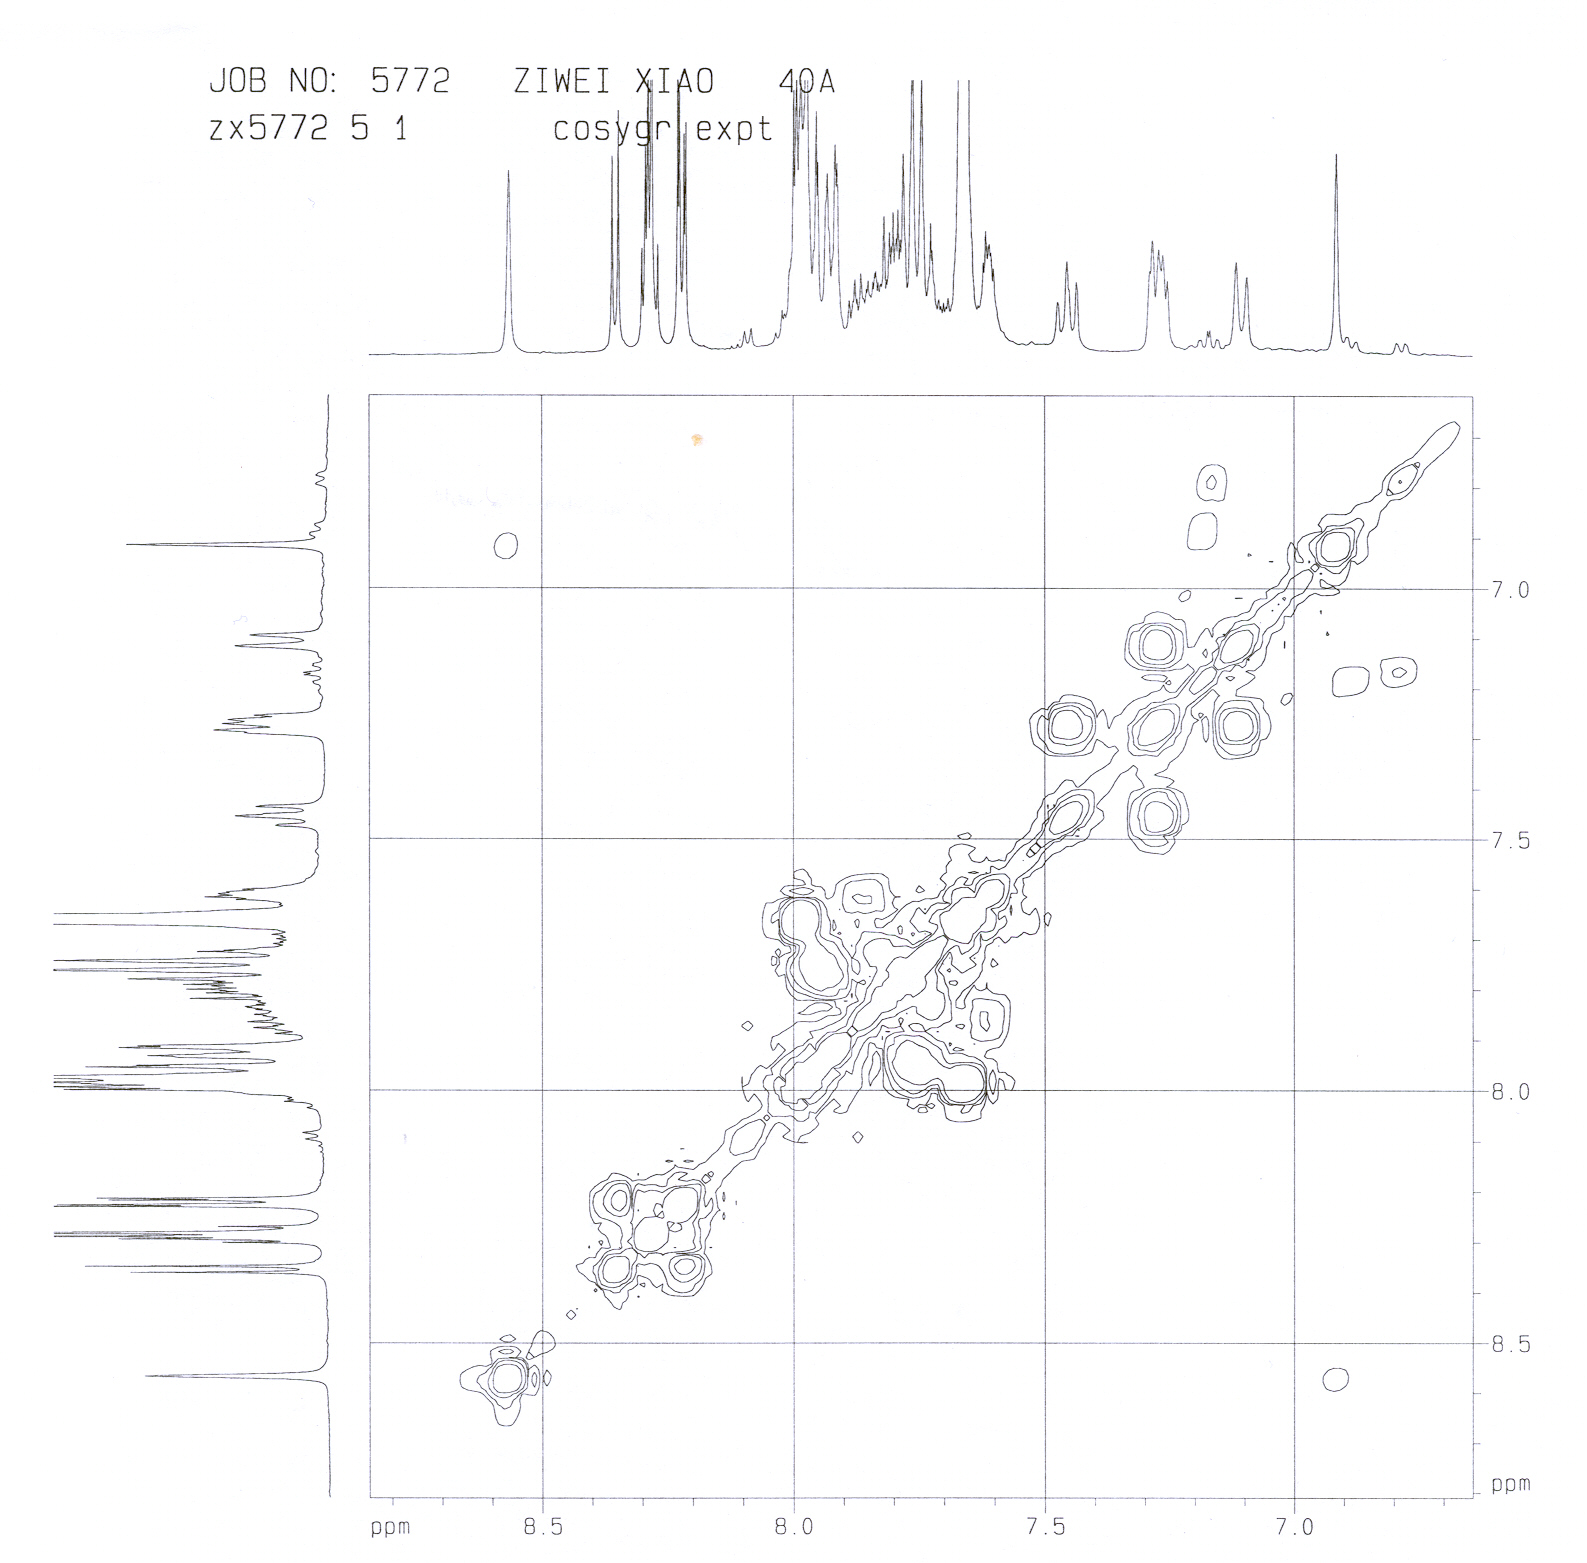


**Figure 3.** COSY spectrum of **5a** (400 MHz, CD2Cl2).
