# Supplementary material for: Diels–Alder reactions of nickel(ii) N-confused porphyrins as dienophiles
Source: Royal Society of Chemistry journal article supplement (doi:10.1039/b203813g), 2002-01-01
Supplement: b203813g(2).doc [file b203813g%282%29.doc]

**Electronic Supplementary Information**

**Diels-Alder reactions of nickel(II) N-confused porphyrins as dienophiles**

**Ziwei Xiao, Brian Patrick and David Dolphin***


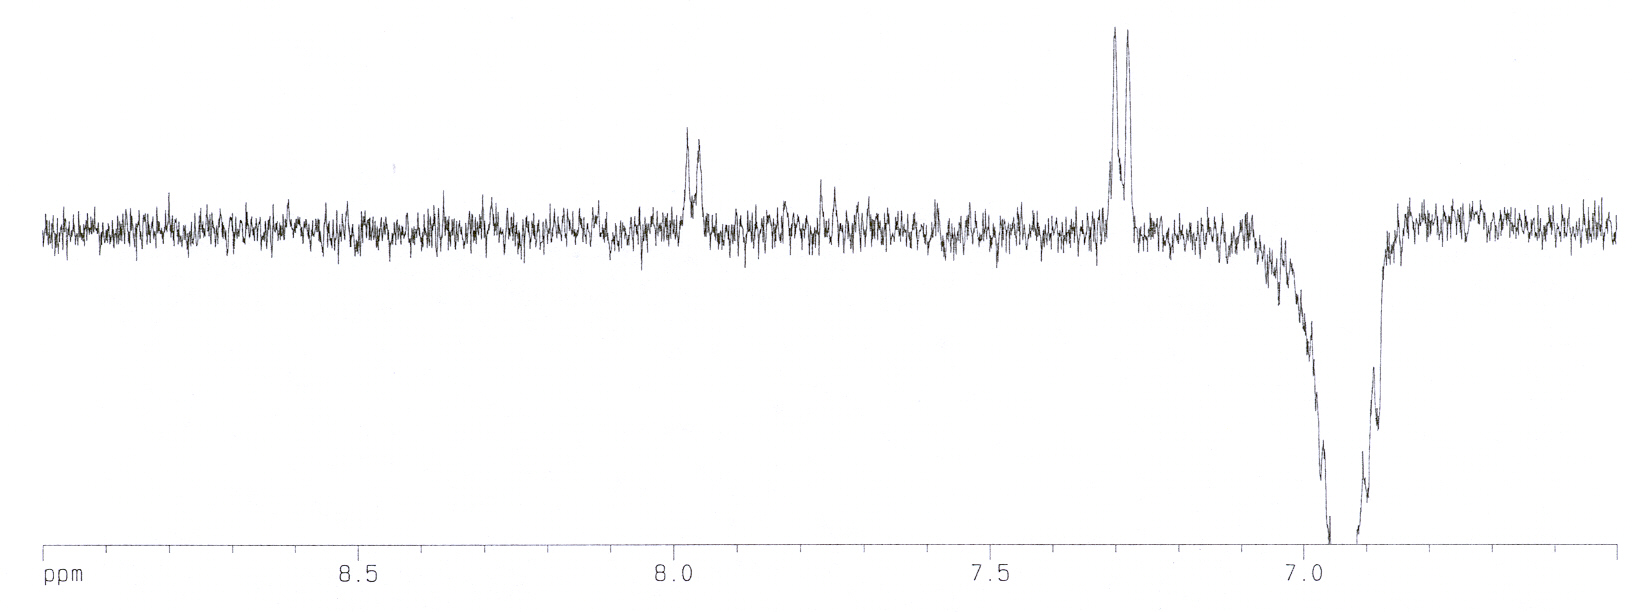


**Figure 4.** 1H NMR spectrum of **5a** upon irradiation at 6.91 ppm (400 MHz, CD2Cl2).


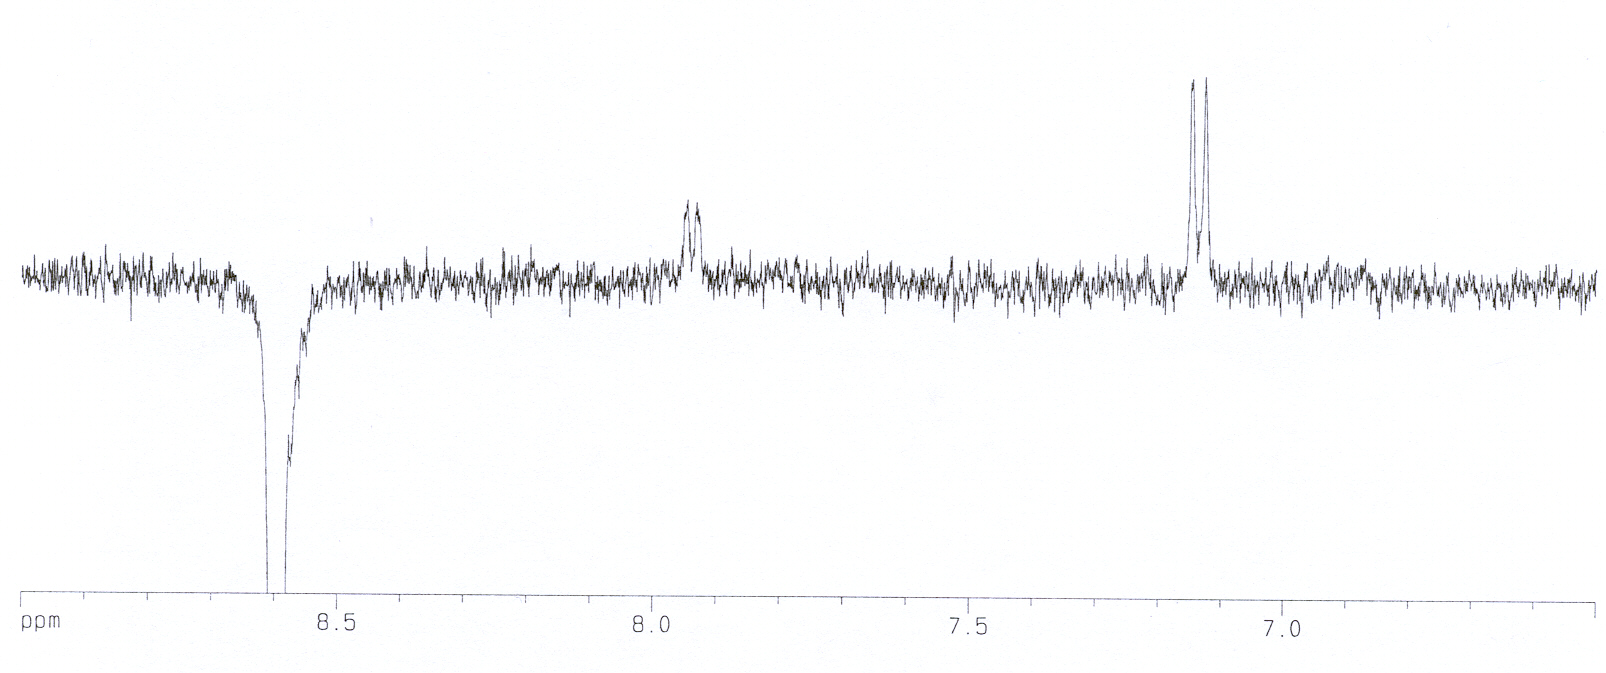


**Figure 5.** 1H NMR spectrum of **5a** upon irradiation at 8.57 ppm (400 MHz, CD2Cl2).

Selected data for **5b**:R*f* (silica-CH2Cl2/hexanes 2:1) 0.77; 1H-NMR (300 MHz, CD2Cl2) =2.61 (s, 3H),2.63 (s, 6H),2.70 (s, 3H),6.87 (s, 1H), 6.90 (s, 1H), 7.14-7.25 (m, 2H), 7.36-7.55 (m, 9H), 7.64 (d, *J*= 7.9 Hz, 2H), 7.76 (d, *J*= 7.9 Hz, 2H), 7.87 (d, *J*= 7.5 Hz, 4H), 8.19-8.27 (m, 3H), 8.28-8.35 (m, 3H), 8.42 (s, 1H); UV-vis (CH2Cl2) max/nm (log ) 440 (5.07), 628 (4.75); MS (LSIMS) 827 (MH+, 100%); HRMS (LSIMS) *m/e* calc'd for C56H41N4Ni: 827.26842, found 827.27036 (MH+).


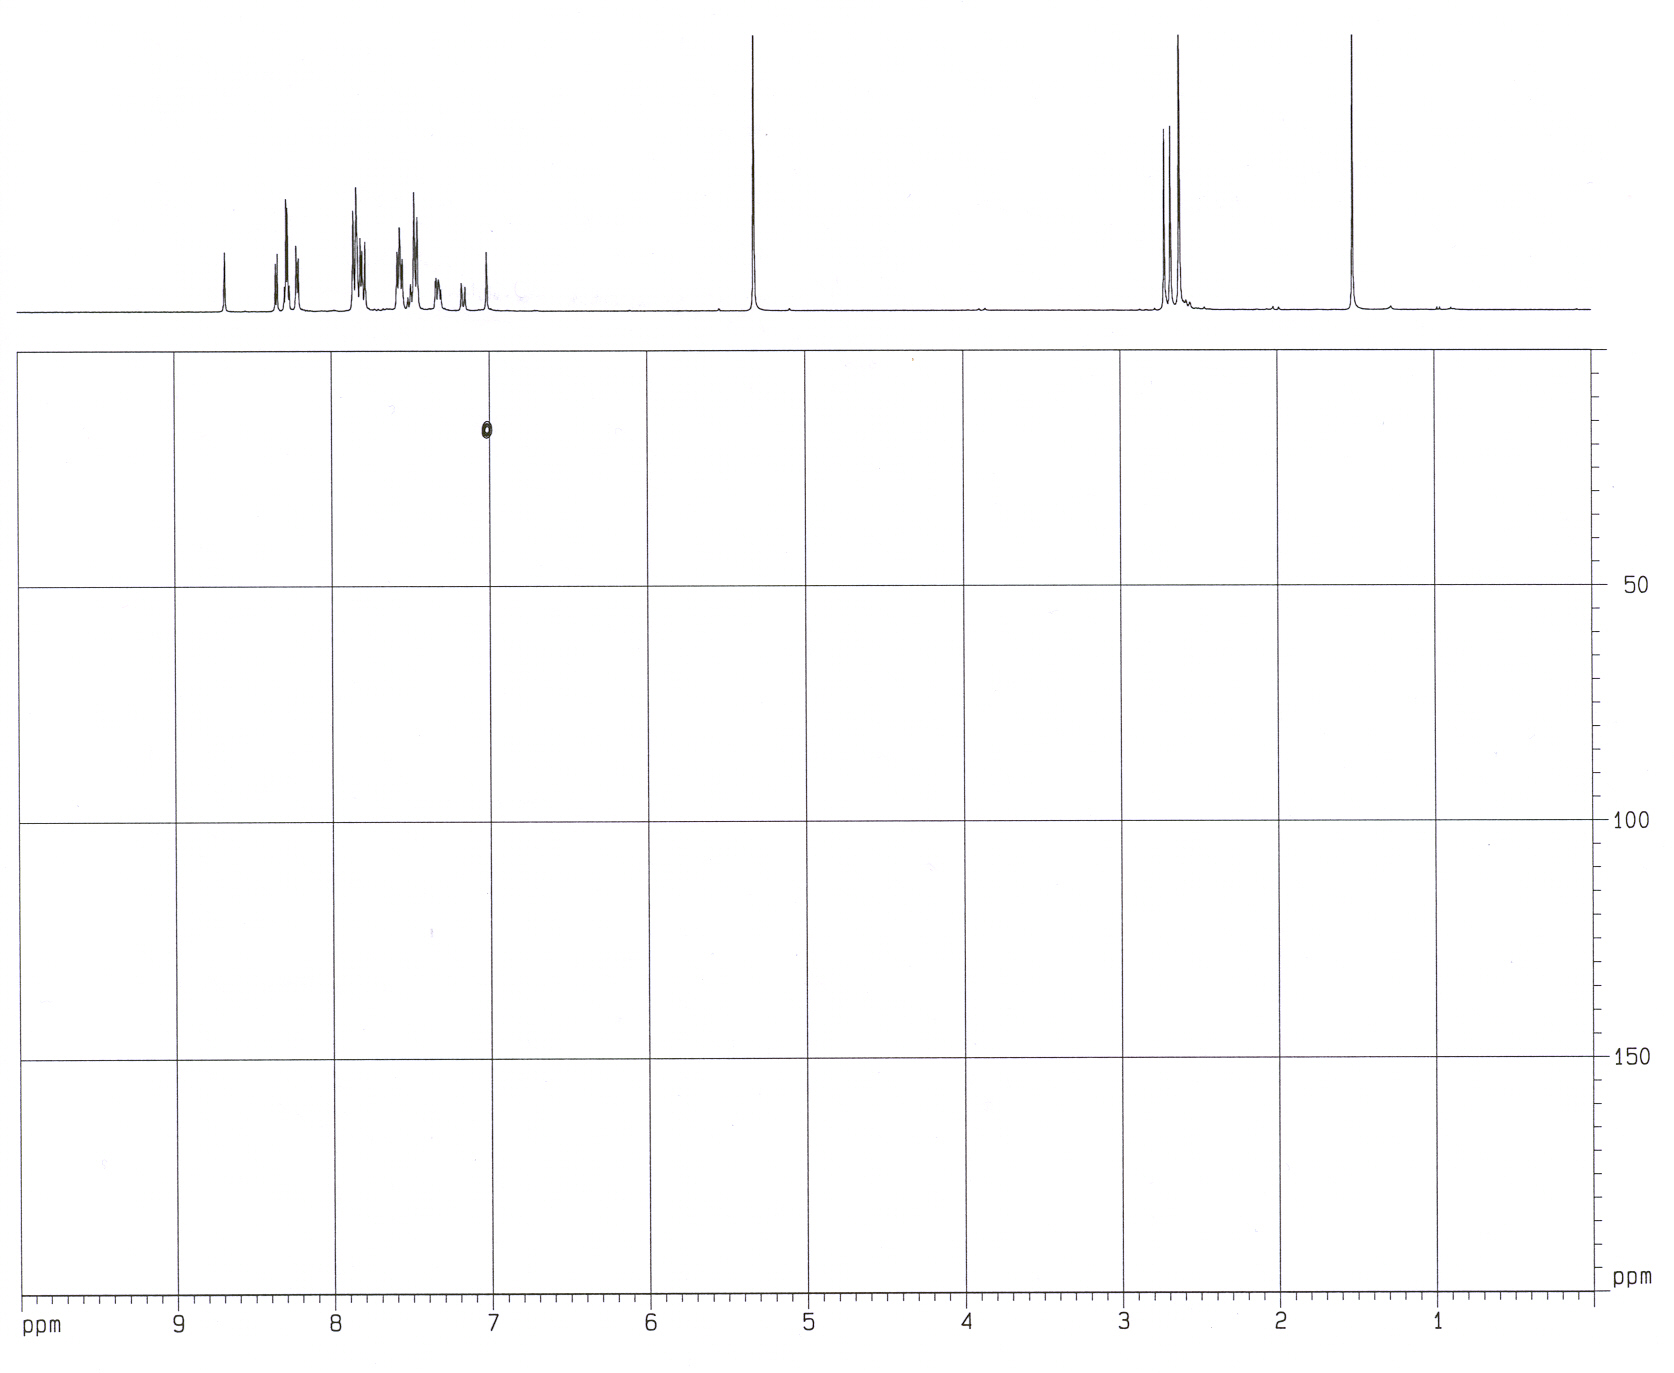


**Figure 6.** 1H/15N HSQC spectrum of **5b** (400 MHz, CD2Cl2).
