# Supplementary material for: Diels–Alder reactions of nickel(ii) N-confused porphyrins as dienophiles
Source: Royal Society of Chemistry journal article supplement (doi:10.1039/b203813g), 2002-01-01
Supplement: b203813g(3).doc [file b203813g%283%29.doc]

**Electronic Supplementary Information**

**Diels-Alder reactions of nickel(II) N-confused porphyrins as dienophiles**

**Ziwei Xiao, Brian Patrick and David Dolphin***


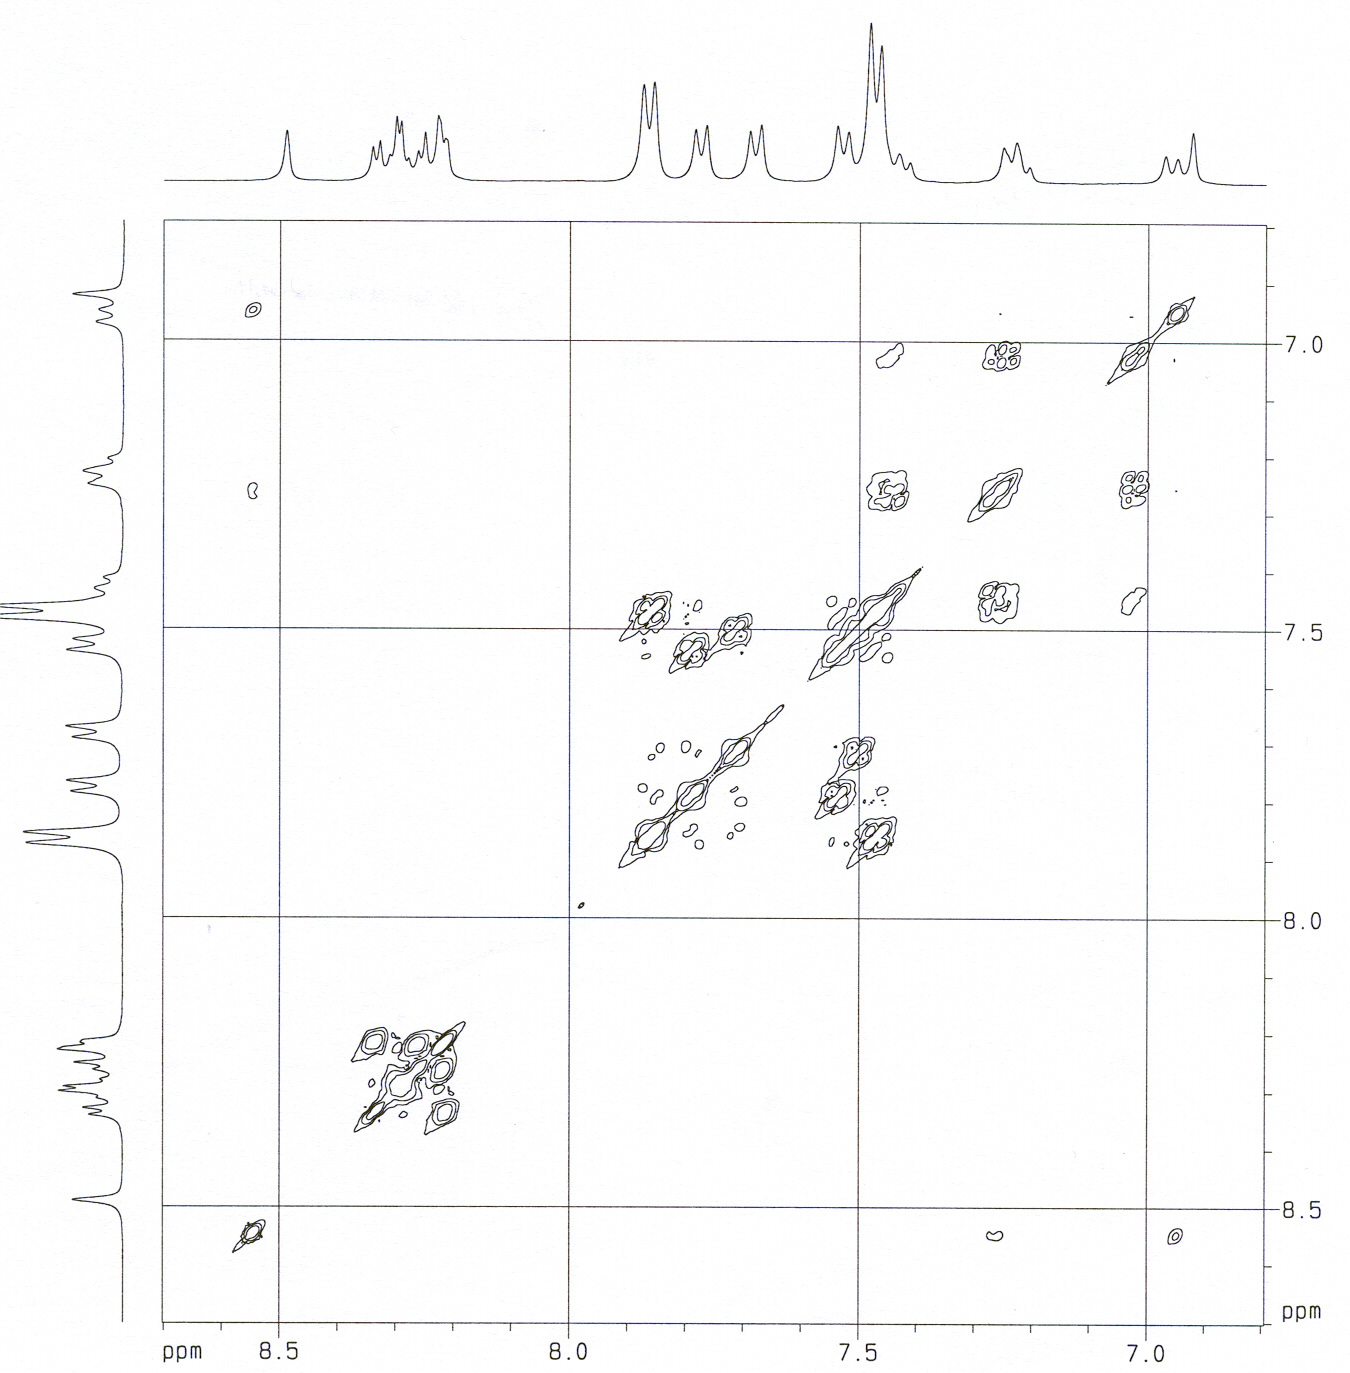


**Figure 7.** COSY spectrum of **5b** (400 MHz, CD2Cl2).


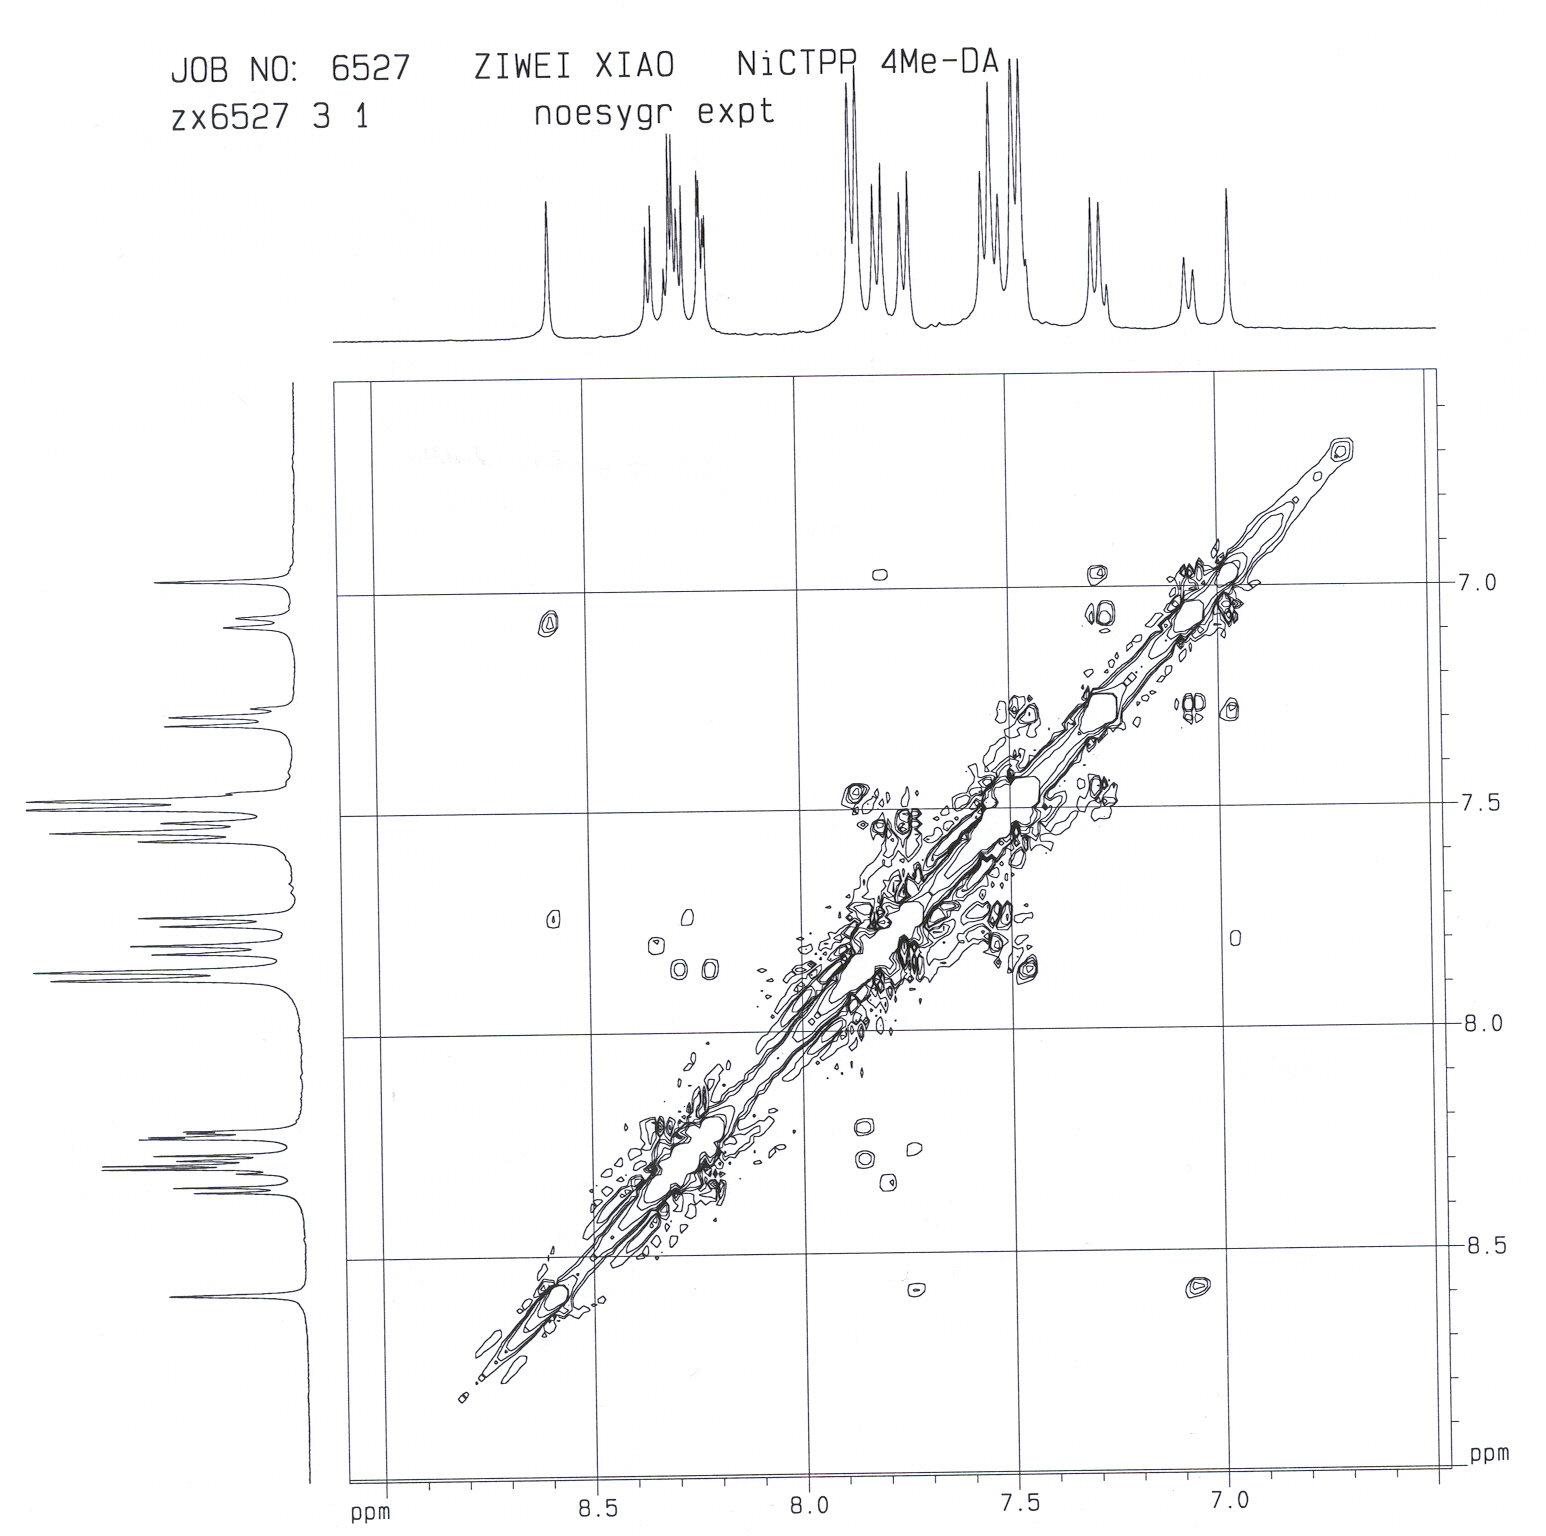


**Figure 8.** NOESY spectrum of **5b** (400 MHz, CD2Cl2).
